# Supplementary material for: Nanoscale imaging of untreated mammalian cells in a medium with low radiation damage using scanning electron-assisted dielectric microscopy
Source: PubMed Central journal article supplement (PMC4931576; doi:10.1038/srep29169), 2016-07-04
Supplement: srep29169-s1.pdf [file srep29169-s1.pdf]

## **Supplementary information**

### **Nanoscale imaging of untreated mammalian cells in a medium with low radiation damage using scanning electron-assisted dielectric microscopy**

Tomoko Okada & Toshihiko Ogura\*

Biomedical Research Institute, National Institute of Advanced Industrial Science and Technology (AIST), Central 2, Umezono, Tsukuba, Ibaraki 305-8568, Japan

\*Corresponding author: Toshihiko Ogura

Biomedical Research Institute, National Institute of  
Advanced Industrial Science and Technology (AIST),  
Umezono 1-1-1, Tsukuba, Ibaraki 305-8568, Japan  
Tel.: +81-29-861-3408, Fax: +81-29-861-2677  
E-mail: t-ogura@aist.go.jp

**This PDF file includes:**

Supplementary Figs 1 to 5

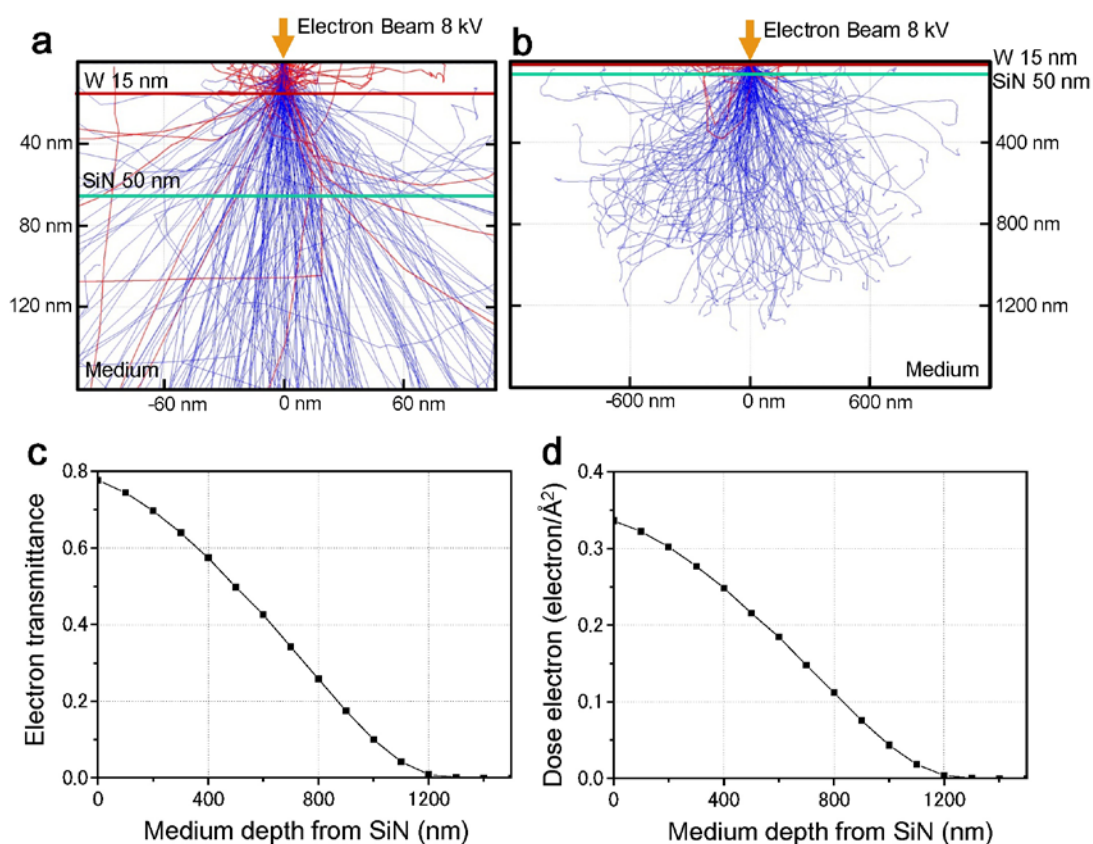

**Supplementary Figure 1. Analysis of the electron trajectory in W-coated SiN film and medium in a Monte Carlo (MC) simulation.** **a**, MC simulation analysis of W-coated SiN film, using CASINO ver. 2.42 (ref. 22); the electron trajectory area in a 15-nm W layer on 50-nm SiN film is shown. The respective densities of the W layer and SiN film were  $19.3 \text{ g/cm}^3$  and  $3.12 \text{ g/cm}^3$ , and the respective thicknesses were 15 nm and 50 nm. The simulation parameters were set at 100,000 electrons, 8 kV accelerating voltage, and 3 nm EB spot diameter. **b**, Electron trajectories in W-coated SiN film with medium. Irradiated electrons were dispersed to a depth of almost 1  $\mu\text{m}$ . **c**, Transmitted irradiated electrons in medium were calculated at each medium depth from the SiN film in a MC simulation. Electron transmittance just below the SiN film was 0.774; this value gradually decreased and reached 0 at a depth of 1.2  $\mu\text{m}$ . **d**, The electron dose in medium was calculated at each EM condition and electron transmittance shown in (c), with a current of 10 pA, scanning area of  $12 \mu\text{m} \times 9.6 \mu\text{m}$ , and scanning time of 80 s. The electron dose just below the SiN film was  $0.334 \text{ electron/\AA}^2$ ; this dose gradually decreased and reached 0  $\text{electron/\AA}^2$  at a depth of 1.2  $\mu\text{m}$ .

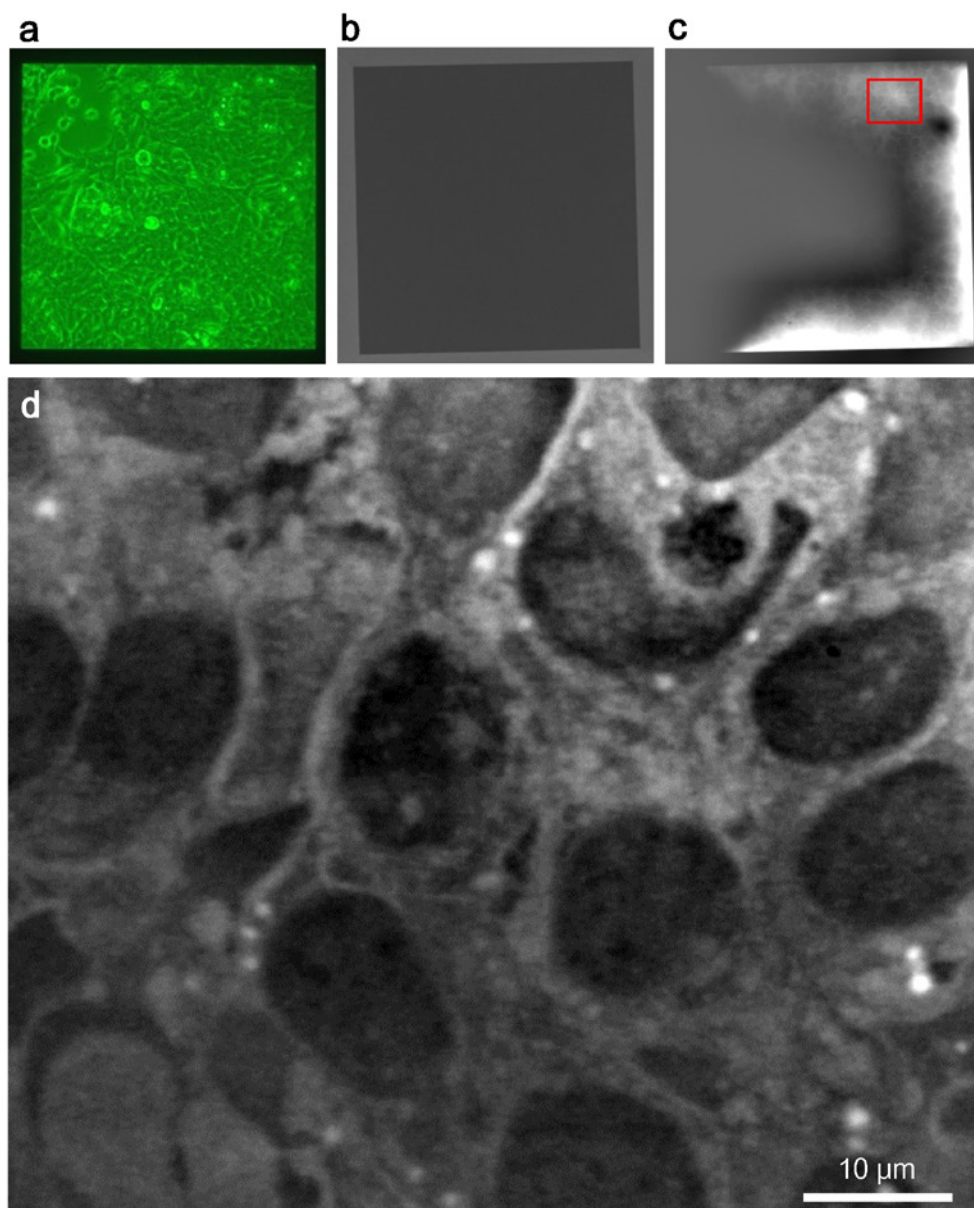

**Supplementary Figure 2. Optical phase and dielectric observation images of the same cells.** **a**, Optical microscopy image of cultured 4T1E/M3 cells in a confluent monolayer on SiN film in a dish holder. A SiN film size is  $0.4 \times 0.4$  mm. **b**, Secondary electron detector-generated images of the same area as in (a). The image shows the SiN surface without cellular structures. **c**, Simultaneously observed dielectric image of the area in (b). The electric field signal was detected by the area of SiN film. **d**, High-magnification image of the red box in (c). Dielectric images clearly revealed cancer cells in the SiN square windows. The scale bar represents  $10 \mu\text{m}$  in (d).

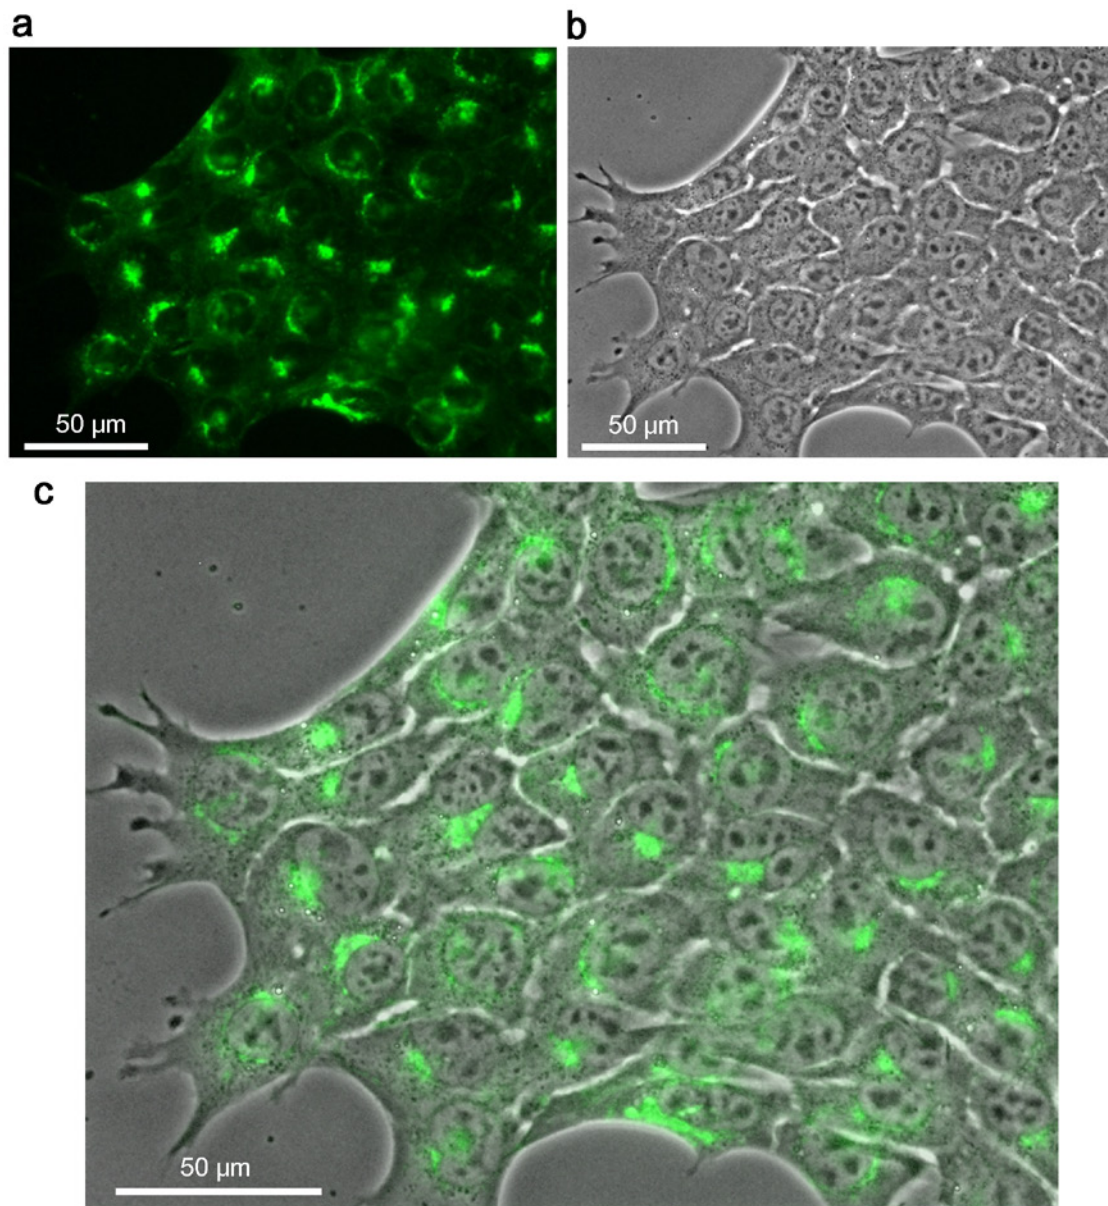

**Supplementary Figure 3. Optical phase and fluorescence observation images of cells stained with Golgi/ER-specific dye.** **a**, Fluorescence image of Golgi/ER-stained cells obtained from an optical microscope with a fluorescence filter. **b**, Optical phase contrast image of stained cultured cells obtained with an optical microscope. **c**, The merged picture of a Golgi/ER fluorescence image (**a**) and a phase contrast image (**b**). The ER and Golgi apparatus are localized near the cell nucleus. The scale bars represent 50  $\mu\text{m}$  in (**a**) – (**c**).

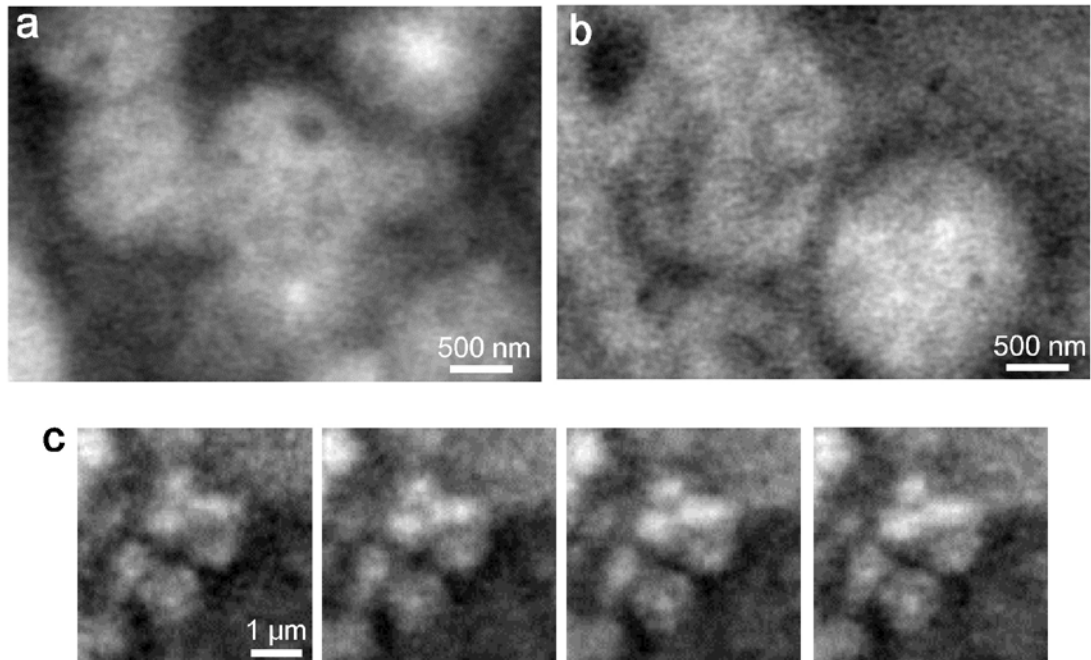

**Supplementary Figure 4. Enlarged images of vesicle regions using SE-ADM. a,** Enlarged images of the vesicle regions highlighted in red boxes in Figure 3b. **b,** Enlarged images of the vesicle regions highlighted in red boxes in Figure 3d. **c.** Enlarged images of a vesicle that exhibited contrast changes throughout the four observations indicated by blue arrows in Figure 4a–d. The scale bars represent 500 nm in **(a)** and **(b)** and 1  $\mu\text{m}$  in **(c)**.



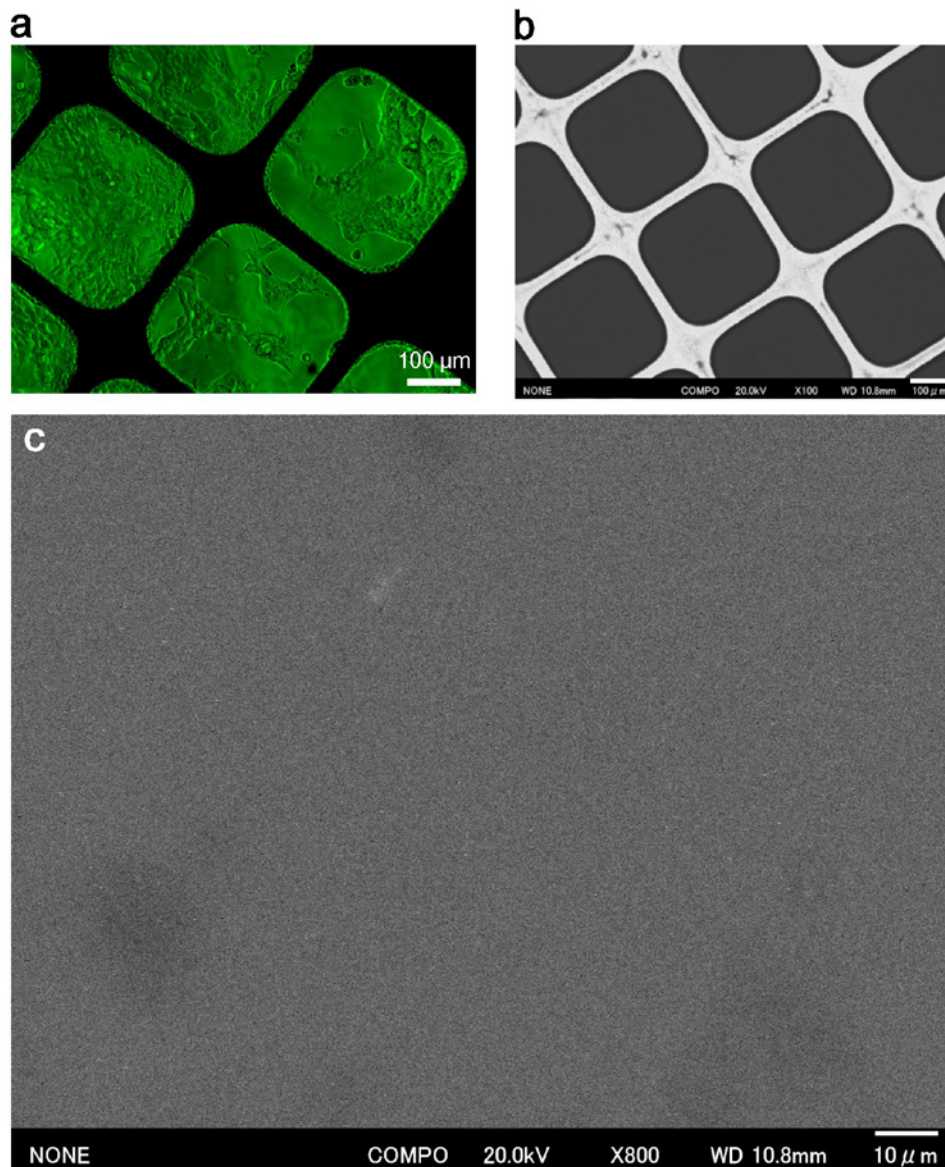

**Supplementary Figure 5. FE-SEM observation of unfixed and unstained cells in a traditional atmospheric holder (Wet SEM).** **a**, Phase-contrast optical image of a culture dish in the Wet SEM capsule (ref. 10). Untreated cells in medium are clearly visible in the wet capsule membrane by optical phase microscopy. **b**, Low-magnification FE-SEM image of the same cultured cells in the wet capsule shown in **(a)** with electron backscattering. The grid supporting the membrane is visible in this image. However, unstained cells cannot be detected. **c**, High-magnification image (800 $\times$  magnification) with electron backscattering. The cell structures cannot be detected. The scale bars represent 100  $\mu\text{m}$  in **(a)** and **(b)** and 10  $\mu\text{m}$  in **(c)**.
